# Supplementary material
Source: publisher figshare collection journal article supplement (https://tandf.figshare.com/articles/dataset/_/27905162)

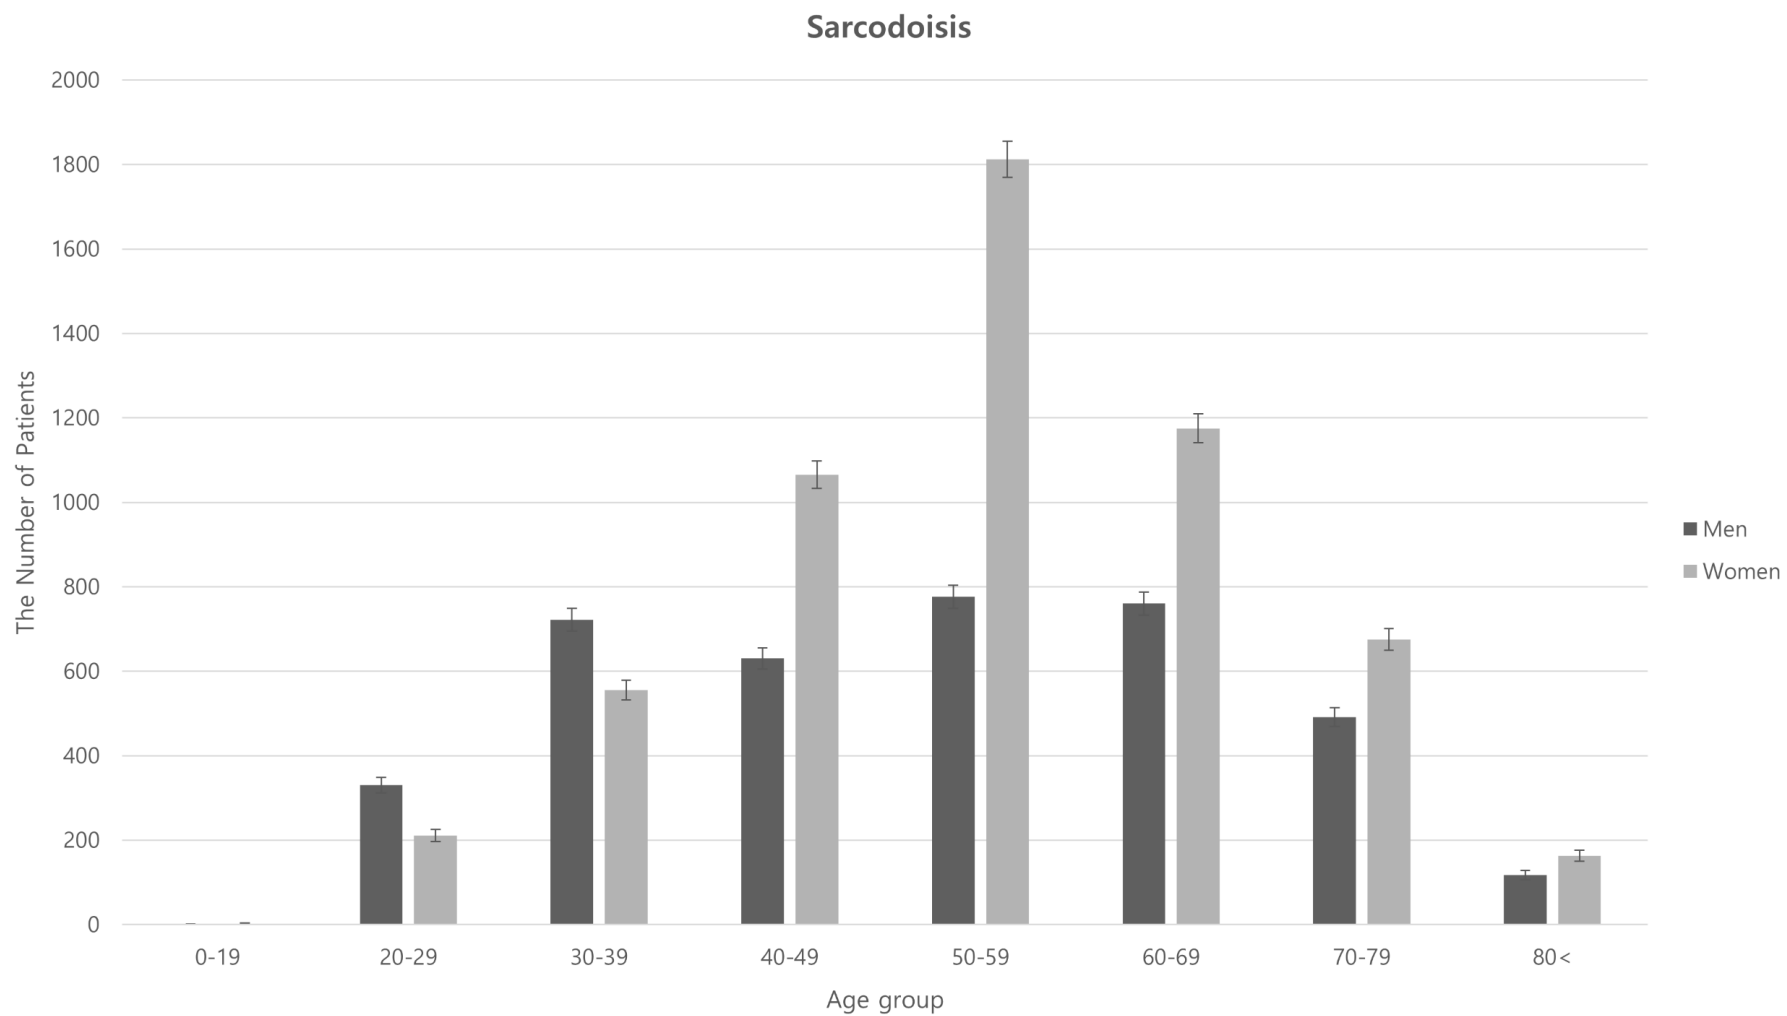

**Supplementary figure 1. The age distribution of patients with Sarcoidosis by gender.**

Supplement: Supplementary file 1 [file 1]

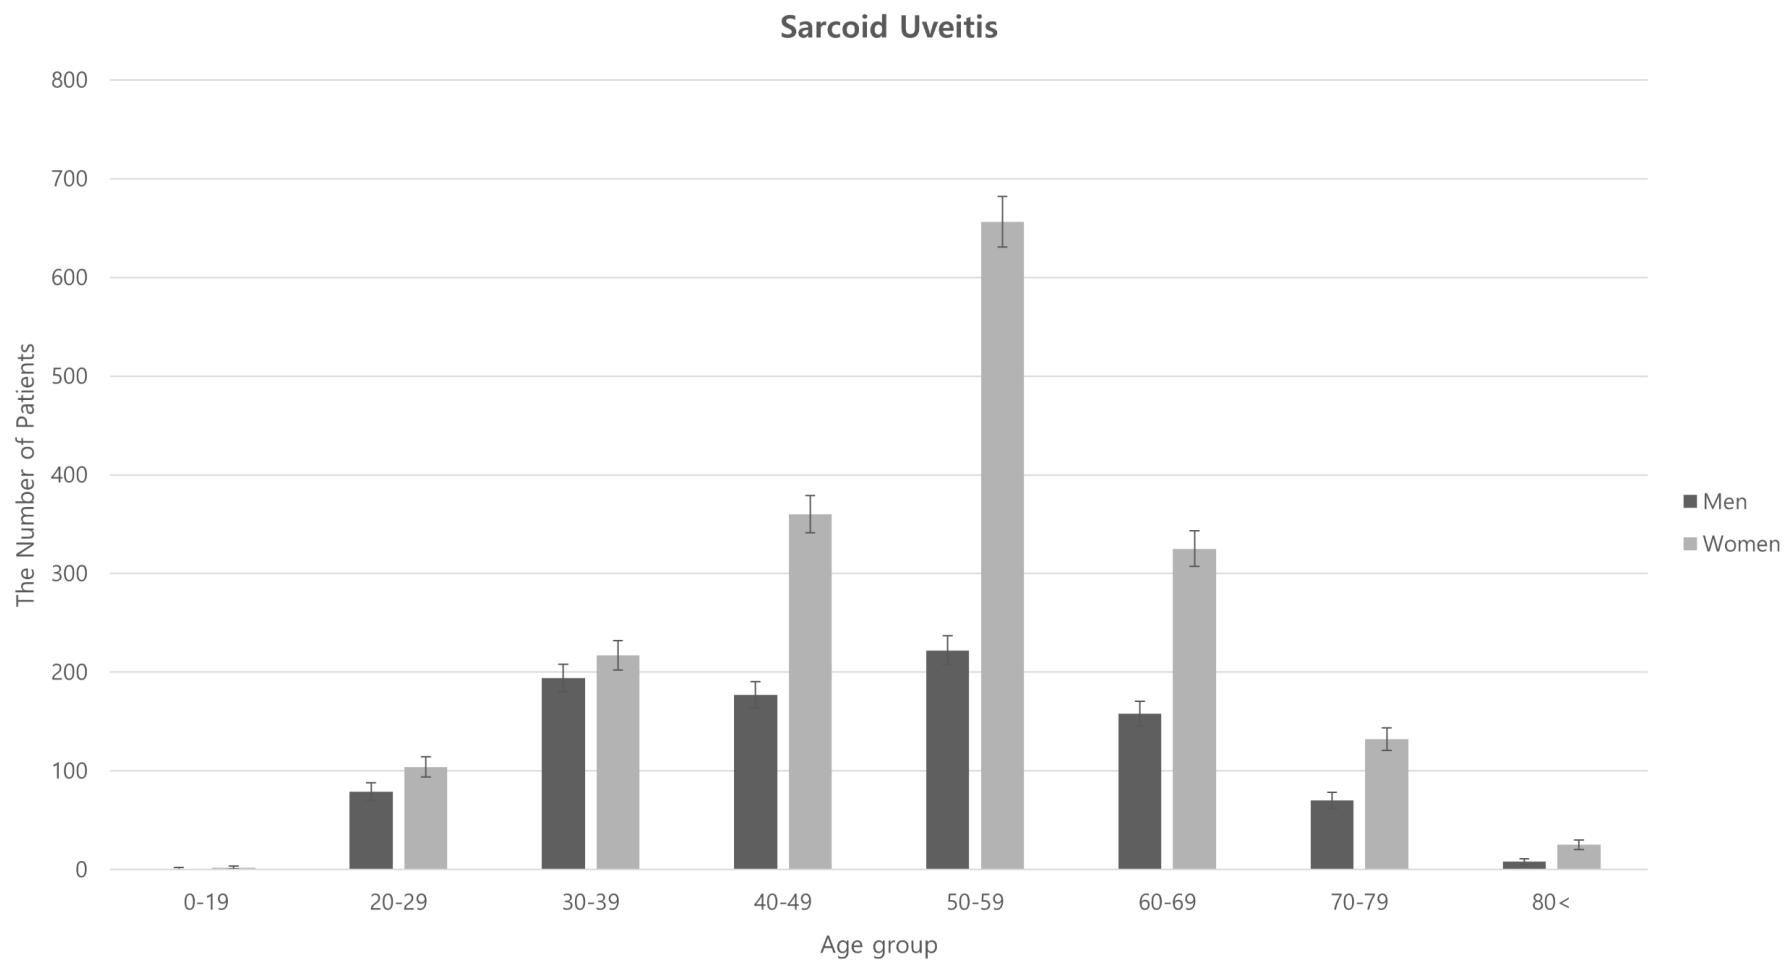

**Supplementary figure 2. The age distribution of patients with Sarcoid Uveitis by gender.**

Supplement: Supplementary file 2 [file 1]
